# Supplementary material for: Influence of ortho- and meta-substituted N-heterocyclic dications towards the self-assembly of p-sulfonatocalix[4]arene
Source: Royal Society of Chemistry journal article supplement (doi:10.1039/c9ce01410a), 2019-10-29
Supplement: c9ce01410a1.pdf [file c9ce01410a1.pdf]

## Influence of ortho- and meta-substituted N-heterocyclic dications towards the self-assembly of *p*-sulfonatocalix[4]arene

Loh Sze Le,<sup>a</sup> Alexandre N. Sobolev<sup>b</sup>, Lim Siew Huah<sup>c</sup> and Irene Ling<sup>a\*</sup>

### Supplementary Information

Table S1: Summary of successful and unsuccessful multi-component synthesis using combinatorial approach.

| Complex      | 1 | 2 | 3 | 4 | PPh <sub>4</sub> <sup>+</sup> Br <sup>-</sup> | CeCl <sub>3</sub> ·7H <sub>2</sub> O | ErCl <sub>3</sub> ·6H <sub>2</sub> O | GdCl <sub>3</sub> ·6H <sub>2</sub> O |
|--------------|---|---|---|---|-----------------------------------------------|--------------------------------------|--------------------------------------|--------------------------------------|
| Complex I    | √ | √ |   |   |                                               |                                      |                                      | √                                    |
| Complex II   | √ |   | √ |   |                                               | √                                    |                                      |                                      |
| Complex III  | √ |   | √ |   |                                               |                                      | √                                    |                                      |
| Complex IV   | √ |   |   | √ |                                               | √                                    |                                      |                                      |
| Complex V    | √ |   |   | √ |                                               | √                                    |                                      |                                      |
| Complex VI   | √ |   |   | √ |                                               |                                      |                                      | √                                    |
| Complex VII  | √ |   |   | √ |                                               |                                      | √                                    |                                      |
| Complex VIII | √ |   |   | √ | √                                             | √                                    |                                      |                                      |
| Complex IX   | √ |   |   | √ | √                                             |                                      |                                      | √                                    |
| Unsuccessful | √ |   | √ |   |                                               |                                      |                                      | √                                    |
|              | √ |   | √ |   |                                               |                                      | √                                    |                                      |
|              | √ |   |   | √ | √                                             |                                      |                                      | √                                    |
|              | √ |   |   | √ | √                                             |                                      | √                                    |                                      |
|              | √ | √ |   |   |                                               |                                      | √                                    |                                      |
|              | √ | √ |   |   | √                                             | √                                    |                                      |                                      |
|              | √ | √ |   |   | √                                             |                                      |                                      | √                                    |
|              | √ | √ |   |   |                                               |                                      | √                                    |                                      |

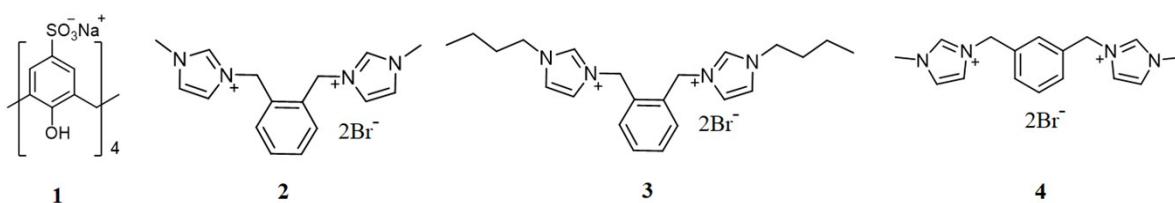

1: *p*-sulfonatocalix[4]arene

2: 3,3'-(1,2-phenylenebis(methylene))bis(1-methyl-1H-imidazol-3-ium)

3: 3,3'-(1,2-phenylenebis(methylene))bis(1-butyl-1H-imidazol-3-ium)

4: 3,3'-(1,3-phenylenebis(methylene))bis(1-methyl-1H-imidazol-3-ium)

Table S2: Dihedral angles of *p*-sulfonatocalix[4]arene for complex **I** to **IX**.

| <b>Complex</b> | <b>Ring 1</b> | <b>Ring 2</b> | <b>Ring 3</b> | <b>Ring 4</b> |
|----------------|---------------|---------------|---------------|---------------|
| <b>I</b>       | 59.19°        | 57.97°        | 57.55°        | 63.46°        |
| <b>II</b>      | 51.00°        | 64.64°        | 39.72°        | 69.89°        |
| <b>III</b>     | 58.44°        | 52.02°        | 64.85°        | 53.30°        |
| <b>IV</b>      | 51.37°        | 67.15°        | 39.35°        | 65.03°        |
| <b>V</b>       | 64.64°        | 44.64°        | 60.80°        | 52.46°        |
| <b>VI</b>      | 48.34°        | 72.59°        | 39.64°        | 69.03°        |
| <b>VII</b>     | 48.02°        | 73.08°        | 41.79°        | 70.49°        |
| <b>VIII</b>    | 46.90°        | 72.10°        | 39.96°        | 69.74°        |
